# Supplementary material for: Gradient Boosting Machine Identified Predictive Variables for Breast Cancer Patients Pre- and Post-Radiotherapy: Preliminary Results of an 8-Year Follow-Up Study
Source: MDPI journal article supplement (doi:10.3390/antiox11122394), 2022-12-02
Supplement: s1 [file s1]

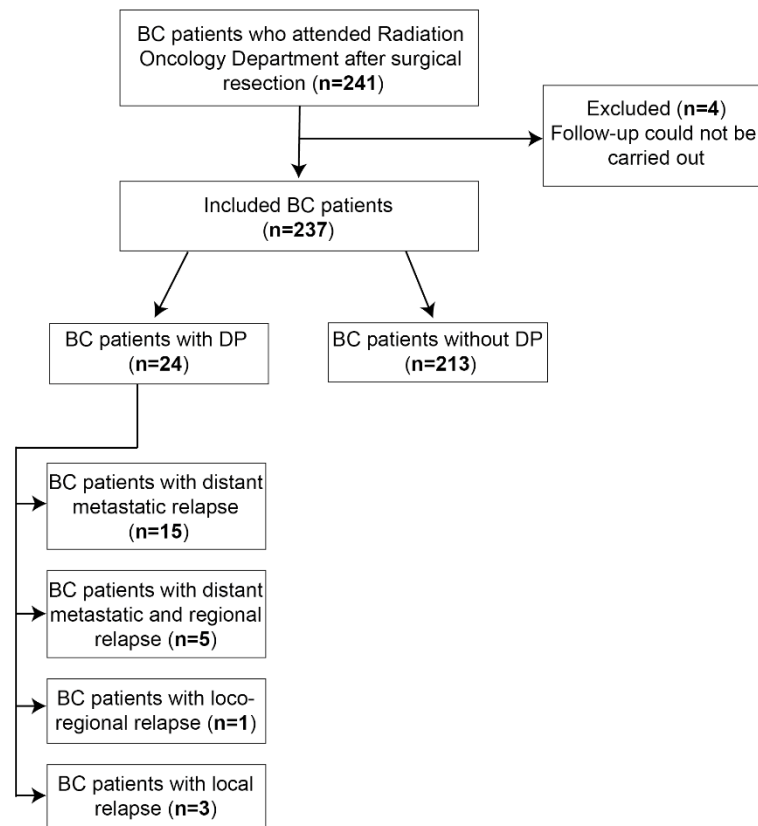

**Supplementary Figure S1.** Flowchart of the retrospective study conducted in patients with breast cancer who undergo radiotherapy. BC: breast cancer; DP: disease progression.

**A**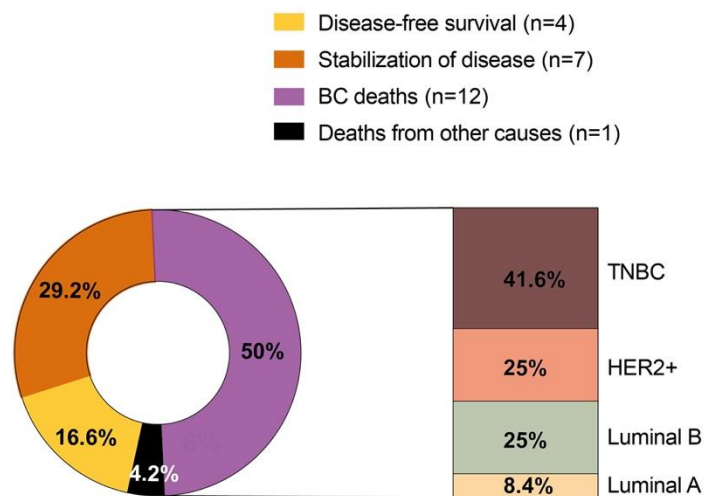**B**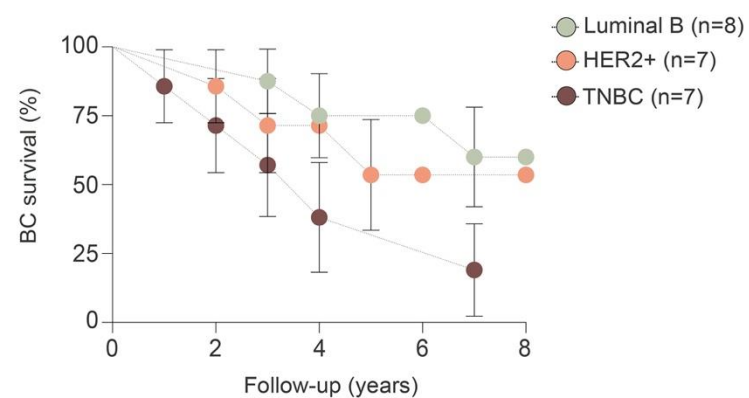

**Supplementary Figure S2.** Tumor characteristics are associated with the prognosis of patients with breast cancer (BC). The donut chart depicts the status (in percentage) of BC patients 8 years post-RT (A). Figure shows the Kaplan-Meier curve of BC patient survival according to tumor molecular subtypes (B). HER2+: positive human epidermal growth factor receptor 2; TNBC: triple-negative breast cancer.

**Supplementary Table S1.** Measured biochemical variables in breast cancer (BC) patients segregated with respect to presence and absence of disease progression (DP) post-RT.

|                                  | With DP<br>(n=24)     |                       | Without DP<br>(n= 213) |                       | p<br>value <sup>1</sup> | p<br>value <sup>2</sup> | p<br>value <sup>3</sup> | p<br>value <sup>4</sup> |
|----------------------------------|-----------------------|-----------------------|------------------------|-----------------------|-------------------------|-------------------------|-------------------------|-------------------------|
|                                  | Pre-RT                | Post-RT               | Pre-RT                 | Post-RT               |                         |                         |                         |                         |
| Hemoglobin, g/dL                 | 11.7 (10.9 - 12.6)    | 12.2 (11.4 - 13.3)    | 12.8 (11.9 - 13.7)     | 13 (12.5 - 13.8)      | 0.551                   | <b>0.002</b>            | <b>&lt;0.001</b>        | <b>0.006</b>            |
| Leukocytes, x10 <sup>9</sup> /L  | 4.4 (3.4 - 5.3)       | 4.4 (3.2 - 6.1)       | 5.7 (4.3 - 7)          | 4.8 (3.9 - 6.0)       | 0.910                   | <b>0.007</b>            | <b>&lt;0.001</b>        | 0.583                   |
| Neutrophils, x10 <sup>9</sup> /L | 2.4 (2 - 3.3)         | 2.8 (2.1 - 4.3)       | 3.4 (2.4 - 4.5)        | 2.9 (2.4 - 3.8)       | 0.460                   | <b>0.014</b>            | <b>0.011</b>            | 0.741                   |
| Lymphocytes, x10 <sup>9</sup> /L | 1.2 (1 - 1.5)         | 1 (0.7 - 1.2)         | 1.5 (1.1 - 1.9)        | 1.2 (0.9 - 1.5)       | <b>0.047</b>            | <b>0.009</b>            | <b>&lt;0.001</b>        | 0.086                   |
| Monocytes, x10 <sup>9</sup> /L   | 0.4 (0.3 - 0.5)       | 0.4 (0.4 - 0.6)       | 0.4 (0.3 - 0.6)        | 0.4 (0.3 - 0.5)       | 0.272                   | 0.348                   | 0.177                   | 0.554                   |
| Eosinophils, x10 <sup>9</sup> /L | 0.09 (0.05 - 0.2)     | 0.1 (0.06 - 0.2)      | 0.1 (0.07 - 0.2)       | 0.1 (0.09 - 0.2)      | 0.210                   | 0.176                   | 0.677                   | 0.139                   |
| Basophils, x10 <sup>9</sup> /L   | 0.03 (0.01 - 0.03)    | 0.01 (0.01 - 0.04)    | 0.02 (0.02 - 0.04)     | 0.02 (0.01 - 0.03)    | 0.643                   | 0.853                   | 0.101                   | 0.389                   |
| Platelets, x10 <sup>9</sup> /L   | 239 (212 - 330.2)     | 240 (214.2 - 262.5)   | 243 (199 - 291.2)      | 221 (181 - 249)       | <b>0.033</b>            | 0.602                   | <b>&lt;0.001</b>        | 0.150                   |
| Total cholesterol, mmol/L        | 5.5 (4.9 - 6.1)       | 5.5 (4.9 - 6.1)       | 5.6 (4.8 - 6.2)        | 5.5 (4.8 - 6.1)       | 0.629                   | 0.803                   | 0.077                   | 0.931                   |
| HDL-cholesterol, mmol/L          | 1.4 (1.2 - 1.9)       | 1.7 (1.4 - 1.9)       | 1.6 (1.3 - 1.9)        | 1.6 (1.3 - 1.8)       | 0.845                   | 0.264                   | 0.148                   | 0.262                   |
| LDL-cholesterol, mmol/L          | 0.8 (0.4 - 2.6)       | 0.6 (0.4 - 2.3)       | 0.8 (0.5 - 2.4)        | 0.8 (0.5 - 2.1)       | 0.744                   | 0.815                   | 0.599                   | 0.876                   |
| VLDL-cholesterol, mmol/L         | 2.4 (0.7 - 3.8)       | 2.7 (0.9 - 3.3)       | 2.7 (0.9 - 3.5)        | 2.7 (1 - 3.5)         | 0.776                   | 0.587                   | 0.155                   | 0.292                   |
| Triglycerides, mmol/L            | 1.3 (0.8 - 1.9)       | 0.9 (0.8 - 1.7)       | 1.3 (1 - 1.9)          | 1.4 (0.9 - 1.9)       | 0.107                   | 0.748                   | 0.732                   | <b>0.029</b>            |
| AST, µkat/L                      | 0.3 (0.3 - 0.4)       | 0.3 (0.3 - 0.4)       | 0.3 (0.3 - 0.4)        | 0.3 (0.3 - 0.4)       | 0.407                   | 0.303                   | 0.409                   | 0.971                   |
| ALT, µkat/L                      | 0.3 (0.2 - 0.5)       | 0.3 (0.2 - 0.4)       | 0.3 (0.2 - 0.4)        | 0.3 (0.2 - 0.4)       | 0.468                   | 0.708                   | 0.266                   | 0.912                   |
| PON1 concentration, mg/L         | 89 (59.4 - 127)       | 127.9 (83.5 - 172.6)  | 88 (48 - 135.5)        | 125.7 (97.2 - 168.9)  | <b>0.004</b>            | 0.774                   | <b>&lt;0.001</b>        | 0.911                   |
| PON1 activity, U/L               | 92.1 (81.7 - 101)     | 75.4 (66 - 100.9)     | 97.6 (80.6 - 116.1)    | 88.1 (65 - 103.2)     | <b>0.035</b>            | 0.286                   | <b>&lt;0.001</b>        | 0.807                   |
| PON1-specific activity, U/mg     | 1.2 (0.9 - 1.6)       | 0.5 (0.4 - 1.3)       | 1.1 (0.7 - 2)          | 0.7 (0.4 - 0.9)       | <b>0.027</b>            | 0.755                   | <b>&lt;0.001</b>        | 0.876                   |
| CCL2, ng/L                       | 56 (43.5 - 84.7)      | 72.8 (54.9 - 93.7)    | 51.5 (31.6 - 75.2)     | 62 (28.7 - 83.6)      | 0.332                   | 0.115                   | 0.368                   | 0.137                   |
| IL-4, ng/L                       | 162.6 (116.9 - 242.6) | 15.1 (12.9 - 21.5)    | 168.4 (118.8 - 283.7)  | 17.1 (12.6 - 24.7)    | <b>&lt;0.001</b>        | 0.342                   | <b>&lt;0.001</b>        | 0.626                   |
| IFN-γ, ng/L                      | 238.9 (164.6 - 601.3) | 192.5 (172.5 - 396.8) | 307.9 (213.4 - 678)    | 279.5 (151.7 - 509.4) | 0.093                   | 0.252                   | 0.444                   | 0.387                   |

Values are presented as medians and interquartile range.

<sup>1</sup> Comparison between pre- and post-RT in patients with DP

<sup>2</sup> Comparison between pre-RT without DP and pre-RT in patients with DP

<sup>3</sup> Comparison between pre- and post-RT without DP

<sup>4</sup> Comparison between post-RT without DP and post-RT in patients with DP

AST: aspartate aminotransferase; ALT: alanine aminotransferase; HDL: high-density lipoproteins; LDL: low-density lipoproteins, VLDL: very low-density lipoproteins; PON1: paraoxonase-1; CCL2: C-C Motif Chemokine Ligand 2; IL-4: interleukine-4; IFN-γ: interferon gamma

**Supplementary Table S2.** Linear regression analyses of the variables associated with interleukin-4 (IL-4), lymphocytes and neutrophils in breast cancer patients.

| <sup>A</sup> IL-4 concentration pre-RT; ng/L                        | B       | 95% CI of B        | p value |
|---------------------------------------------------------------------|---------|--------------------|---------|
| Constant                                                            | 88.086  | -120.261 - 296.433 | 0.406   |
| Alcohol habit                                                       | 9.513   | -22.647 - 41.674   | 0.560   |
| Smoking habit                                                       | -9.291  | -37.637 - 19.055   | 0.519   |
| Diabetes Mellitus                                                   | 58.274  | -19.612 - 136.16   | 0.142   |
| Hypertension                                                        | -23.764 | -65.941 - 18.414   | 0.268   |
| Dyslipidemia                                                        | 4.741   | -34.297 - 43.78    | 0.811   |
| Ischemic heart disease                                              | 51.12   | -31.694 - 133.934  | 0.225   |
| Chronic obstructive pulmonary disease                               | 35.802  | -39.635 - 111.239  | 0.351   |
| Menopausal status                                                   | 0.026   | -27.142 - 27.194   | 0.998   |
| Hypothyroidism                                                      | -72.493 | -127.623 - -17.364 | 0.010   |
| <sup>B</sup> Lymphocytes concentration post-RT; x10 <sup>9</sup> /L |         |                    |         |
| Constant                                                            | 2.401   | 1.382 - 3.421      | <0.001  |
| Alcohol habit                                                       | -0.037  | -0.18 - 0.105      | 0.605   |
| Smoking habit                                                       | -0.07   | -0.189 - 0.048     | 0.242   |
| Diabetes Mellitus                                                   | 0.008   | -0.373 - 0.388     | 0.968   |
| Hypertension                                                        | 0.181   | -0.021 - 0.383     | 0.078   |
| Dyslipidemia                                                        | -0.244  | -0.442 - -0.047    | 0.016   |
| Ischemic heart disease                                              | -0.232  | -0.617 - 0.153     | 0.235   |
| Chronic obstructive pulmonary disease                               | -0.169  | -0.52 - 0.182      | 0.342   |
| Menopausal status                                                   | -0.111  | -0.233 - 0.011     | 0.073   |
| Hypothyroidism                                                      | 0.044   | -0.219 - 0.308     | 0.739   |
| <sup>C</sup> Neutrophils concentration post-RT; x10 <sup>9</sup> /L |         |                    |         |
| Constant                                                            | 7.944   | 3.745 - 12.144     | <0.001  |
| Alcohol habit                                                       | 0.446   | -0.142 - 1.034     | 0.135   |
| Smoking habit                                                       | -0.501  | -0.989 - -0.013    | 0.044   |
| Diabetes Mellitus                                                   | -2.906  | -4.473 - -1.34     | <0.001  |
| Hypertension                                                        | 0.334   | -0.498 - 1.166     | 0.428   |
| Dyslipidemia                                                        | -0.576  | -1.39 - 0.237      | 0.163   |
| Ischemic heart disease                                              | 0.829   | -0.757 - 2.415     | 0.303   |
| Chronic obstructive pulmonary disease                               | -0.337  | -1.783 - 1.109     | 0.645   |
| Menopausal status                                                   | -0.096  | -0.598 - 0.406     | 0.706   |
| Hypothyroidism                                                      | 0.424   | -0.663 - 1.511     | 0.441   |

<sup>A</sup> Model summary:  $r^2 = 0.203$ ; p value= 0.413<sup>B</sup> Model summary:  $r^2 = 0.368$ ; p value = 0.041<sup>C</sup> Model summary:  $r^2 = 0.402$ ; p value = 0.012

RT: Radiotherapy.
